# Supplementary material for: Epidemiology of Dengue among Children Aged < 18 Months—Puerto Rico, 1999–2011
Source: PubMed Central journal article supplement (PMC4751950; doi:10.4269/ajtmh.15-0382), 2016-02-03
Supplement: SD5.pdf [file SD5.pdf]

SUPPLEMENTAL TABLE 1

Distribution of average anti-DENV IgG subclass titers\* among 145 children aged < 18 months with DHF or DF (as determined by medical record review) in serum specimens collected 0–5 days postdisease onset, Puerto Rico, 1999–2011

| Anti-DENV IgG     | DHF† ( <i>N</i> = 4) | DF or AFI ( <i>N</i> = 5) | Difference of means (95% CI) |
|-------------------|----------------------|---------------------------|------------------------------|
| IgG1              | 2.17                 | 1.73                      | 0.44 (–4.86 to 5.74)         |
| IgG2              | 0.67                 | 0.03                      | 0.64 (–2.98 to 4.26)         |
| IgG3              | 0.18                 | 0.08                      | 0.10 (–0.25 to 0.44)         |
| IgG4              | 0.03                 | 0.04                      | –0.01 (–0.14 to 0.11)        |
|                   | ( <i>N</i> = 14)     | ( <i>N</i> = 19)          |                              |
| Overall IgG titer | 1.07                 | 0.53                      | 0.55 (–0.34 to 1.43)         |

AFI = acute febrile illness; CI = confidence interval; DENV = dengue virus serotype; DF = dengue fever; DHF = dengue hemorrhagic fever; IgG = immunoglobulin G; WHO = World Health Organization.

\*log<sub>10</sub> titers are shown.

†DHF comparison group includes all children with dengue fever or undifferentiated febrile illness as defined by the 1997 WHO case definitions.

SUPPLEMENTAL TABLE 2

Distribution of average log<sub>10</sub> anti-DENV IgG subclass titers\* among 145 children aged < 18 months with severe or nonsevere dengue (as determined by medical record review) in serum specimens collected 0–5 days postdisease onset, Puerto Rico, from 1999 to 2011

| Anti-DENV IgG     | Severe dengue† ( <i>N</i> = 6) | Nonsevere dengue ( <i>N</i> = 5) | Difference of means (95% CI) |
|-------------------|--------------------------------|----------------------------------|------------------------------|
| IgG1              | 3.98                           | 2.85                             | 1.13 (–8.95 to 11.21)        |
| IgG2              | 0.97                           | 0.57                             | 0.40 (–3.19 to 3.98)         |
| IgG3              | 1.69                           | 0.14                             | 1.55 (–4.56 to 7.65)         |
| IgG4              | < 0.01                         | 0.06                             | –0.06 (–0.17 to 0.05)        |
|                   | ( <i>N</i> = 24)               | ( <i>N</i> = 19)                 |                              |
| Overall IgG titer | 0.92                           | 0.47                             | 0.44 (–0.22 to 1.11)         |

CI = confidence interval; DENV = dengue virus serotype; IgG = immunoglobulin G; WHO = World Health Organization.

\*log<sub>10</sub> titers are shown.

†Severe dengue comparison group includes all children with dengue or dengue with warning signs as defined by the 2009 WHO case definitions.
